# Supplementary material
Source: PubMed Central journal article supplement (PMC7787307)

Cytokine Expression CMML  
**Supplemental Figure 1**

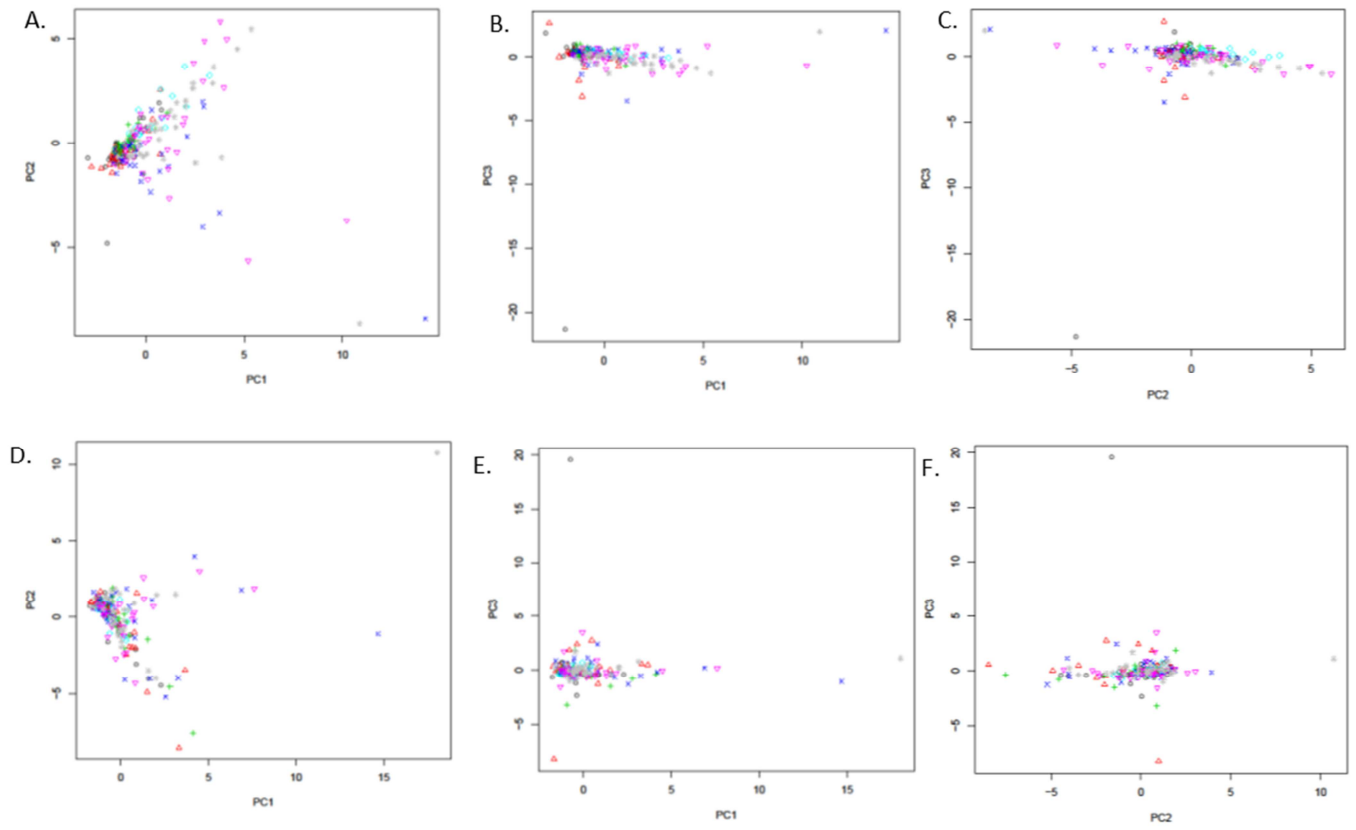

Cytokine Expression CMML  
**Supplemental Figure 2**

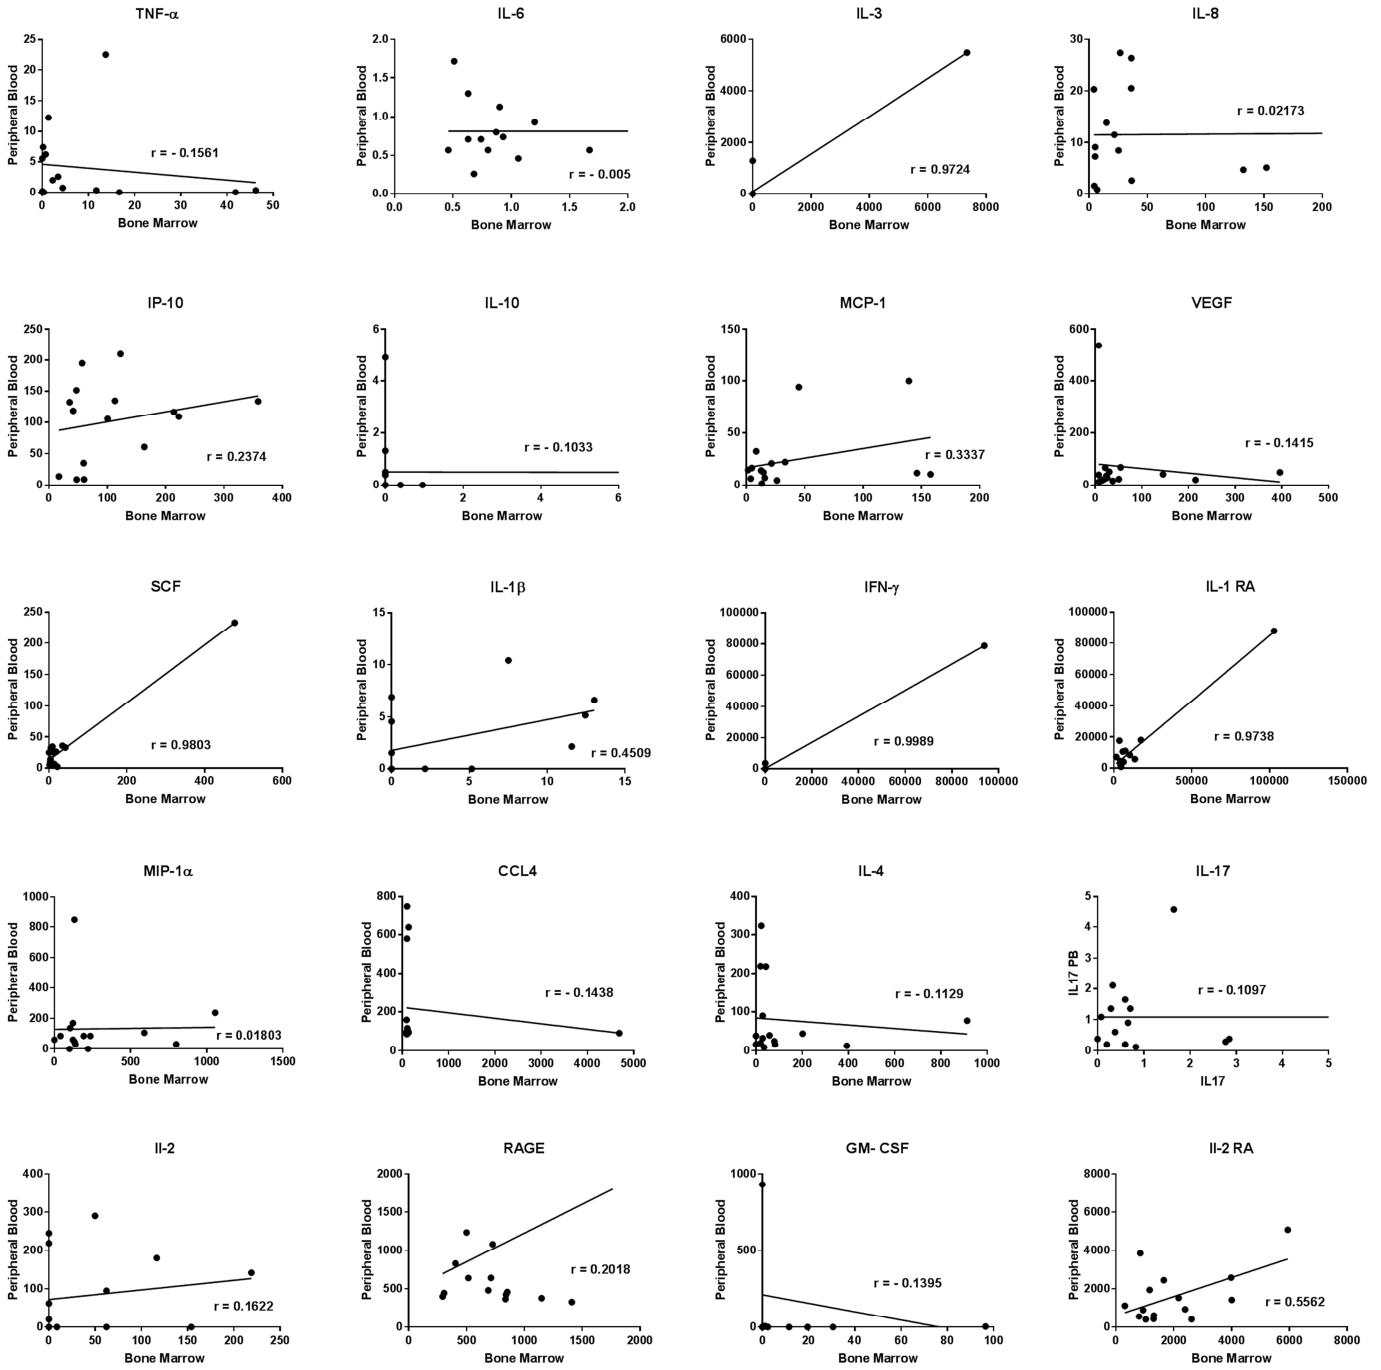

Cytokine Expression CMML

Supplemental Figure 2

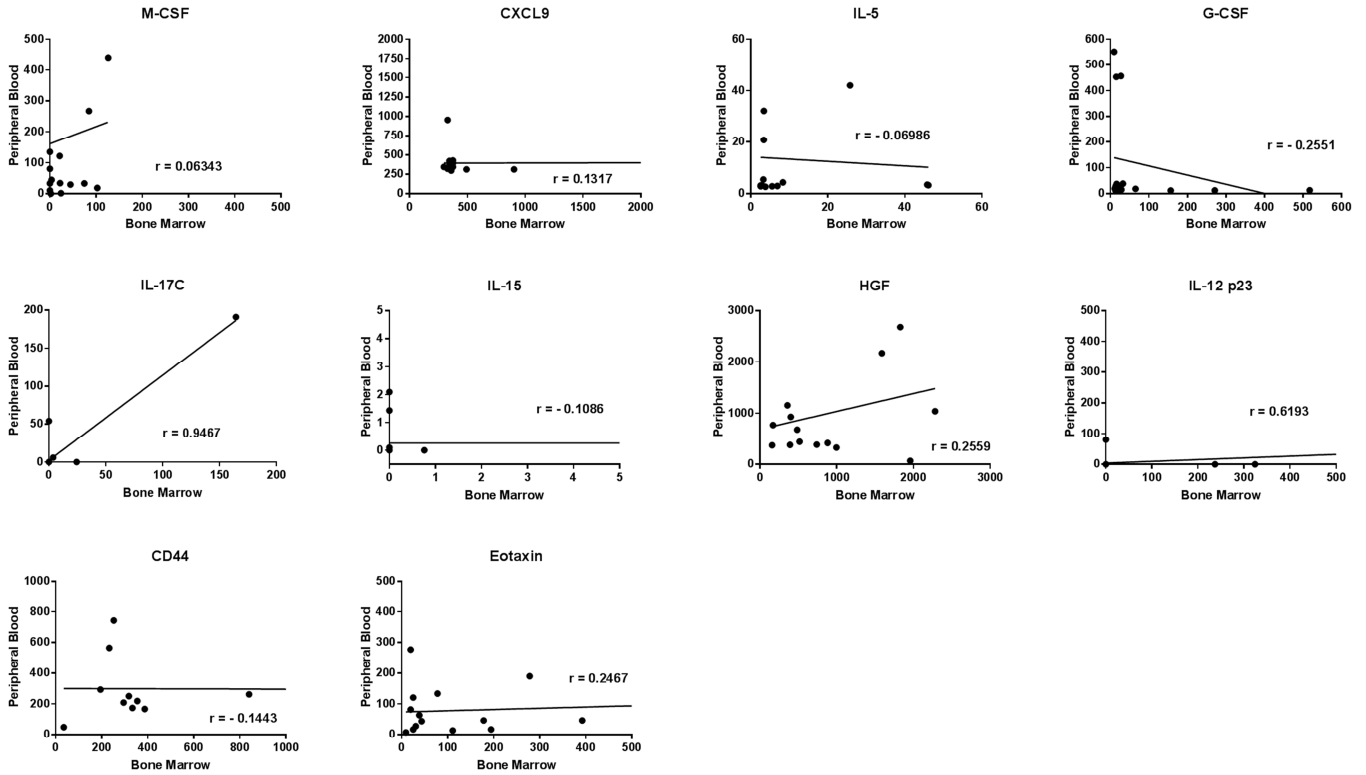



Cytokine Expression CMML  
**Supplemental Figure 4**

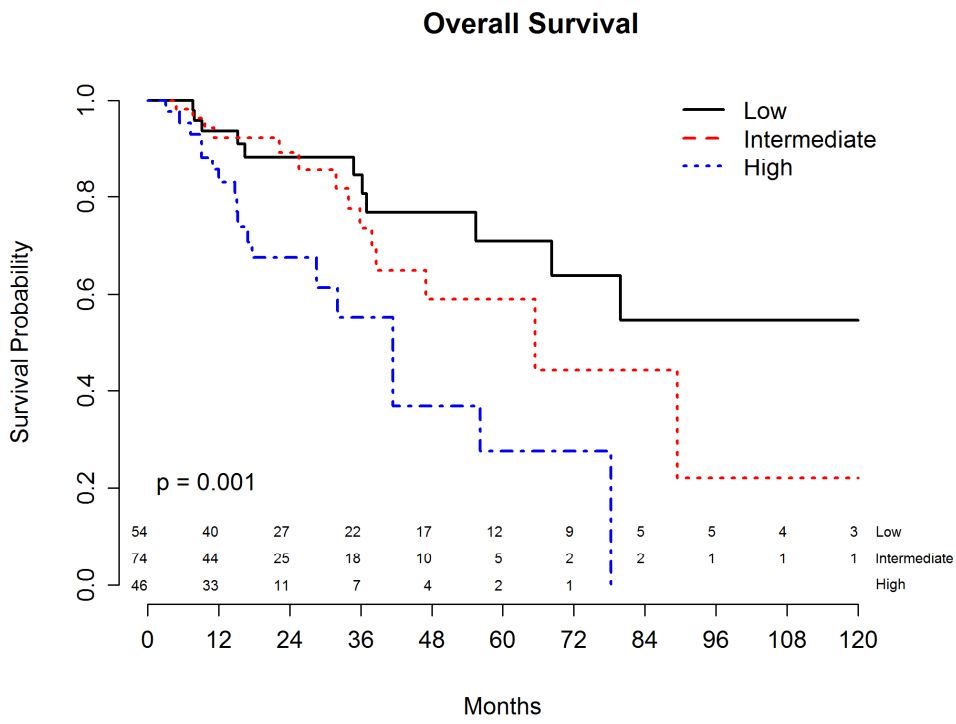

Cytokine Expression CMML  
Supplemental Figure 5

**A**

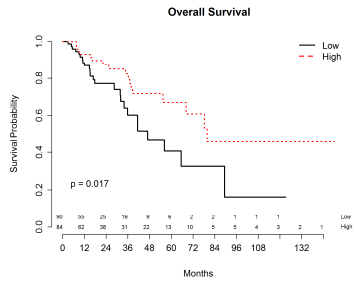

**B**

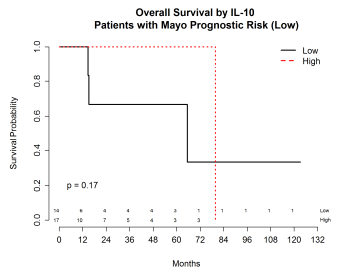

**C**

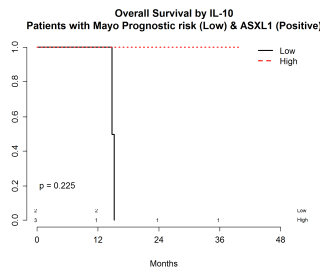

**D**

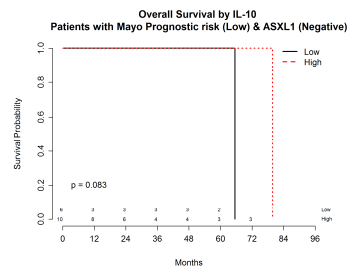

**E**

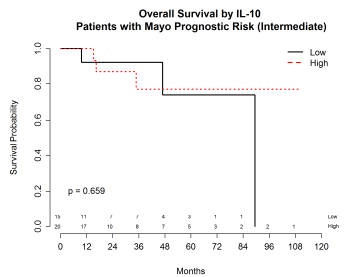

**F**

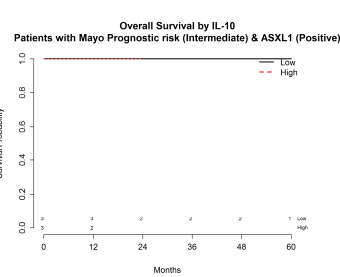

**G**

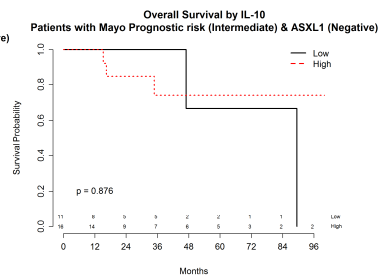

**H**

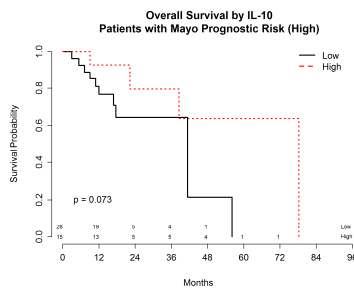

**I**

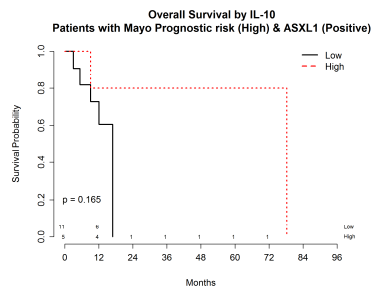

**J**

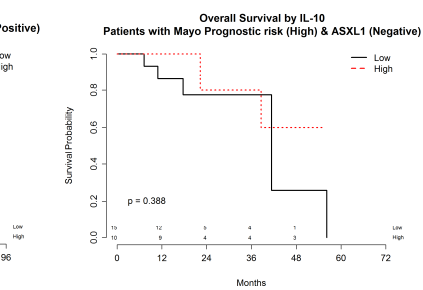

Cytokine Expression CMML  
Supplemental Figure 6

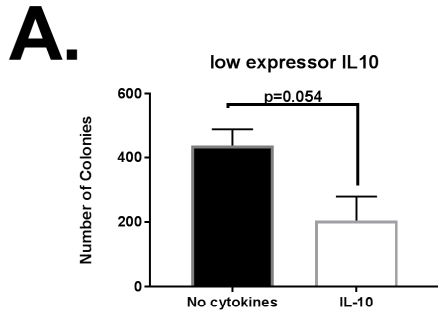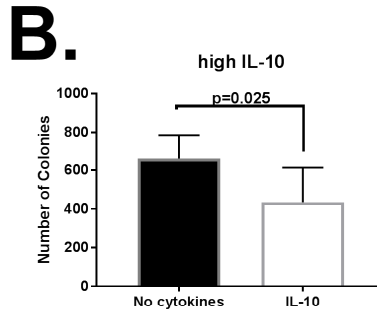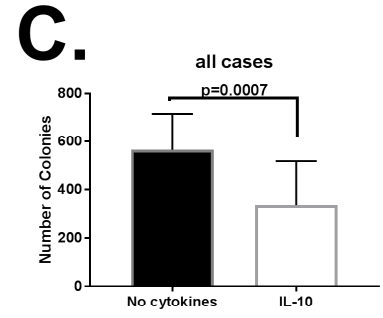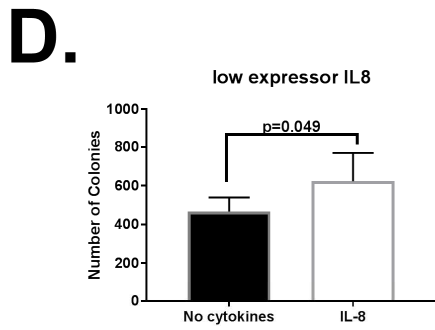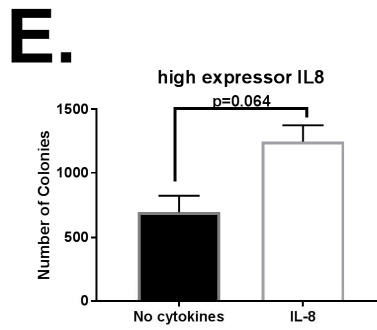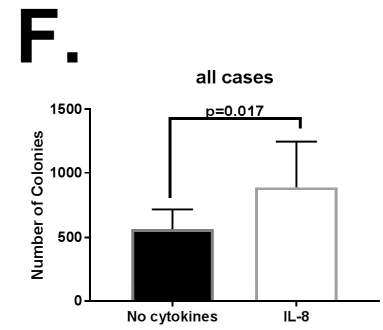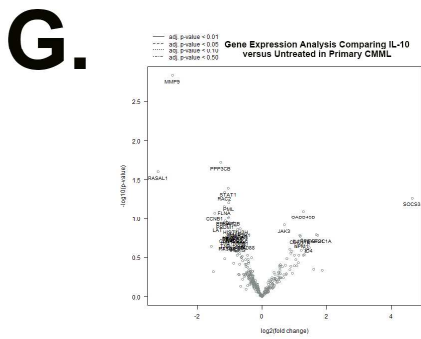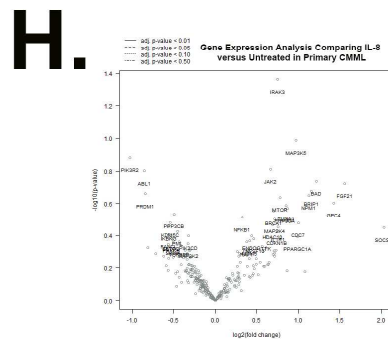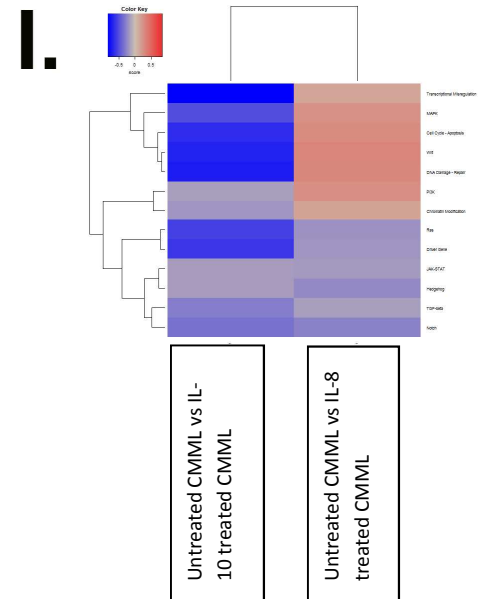

## Supplemental Figure 6G

- adj. p-value < 0.01
- - - adj. p-value < 0.05
- ..... adj. p-value < 0.10
- · - · - adj. p-value < 0.50

### Gene Expression Analysis Comparing IL-10 versus Untreated in Primary CMML

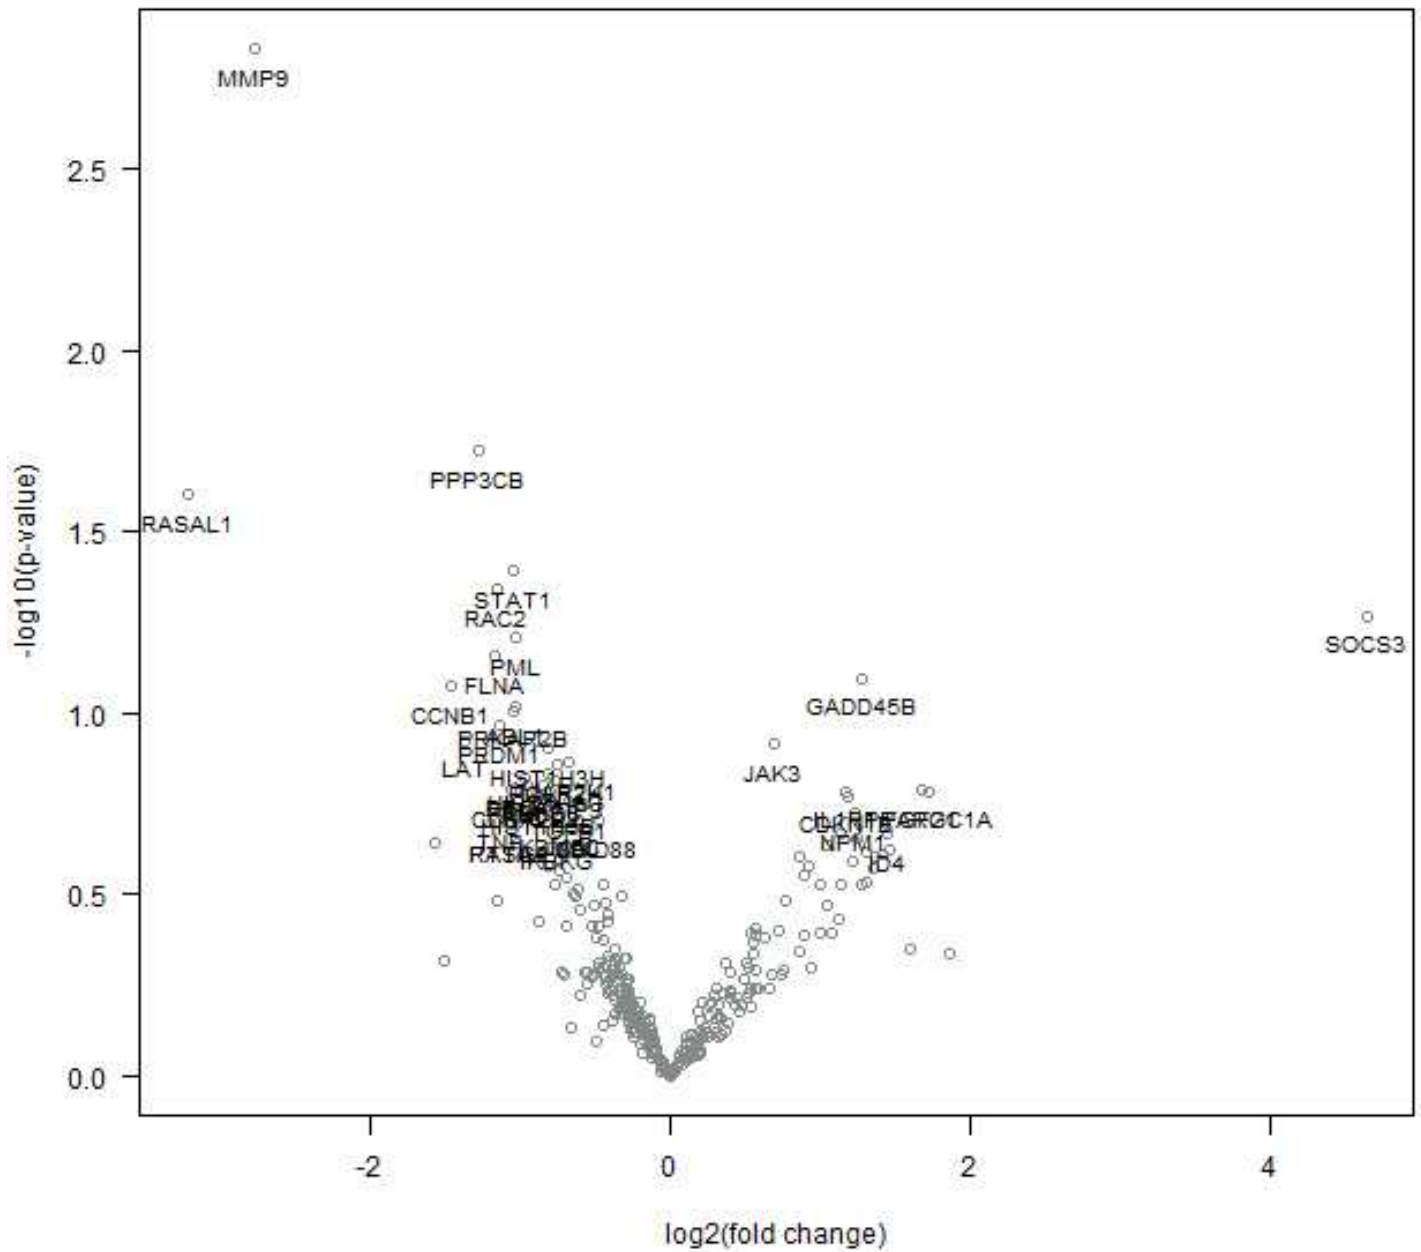



Cytokine Expression CMML

**Supplemental Figure 6H**

- adj. p-value < 0.01
- - - adj. p-value < 0.05
- ..... adj. p-value < 0.10
- adj. p-value < 0.50

### Gene Expression Analysis Comparing IL-8 versus Untreated in Primary CMML

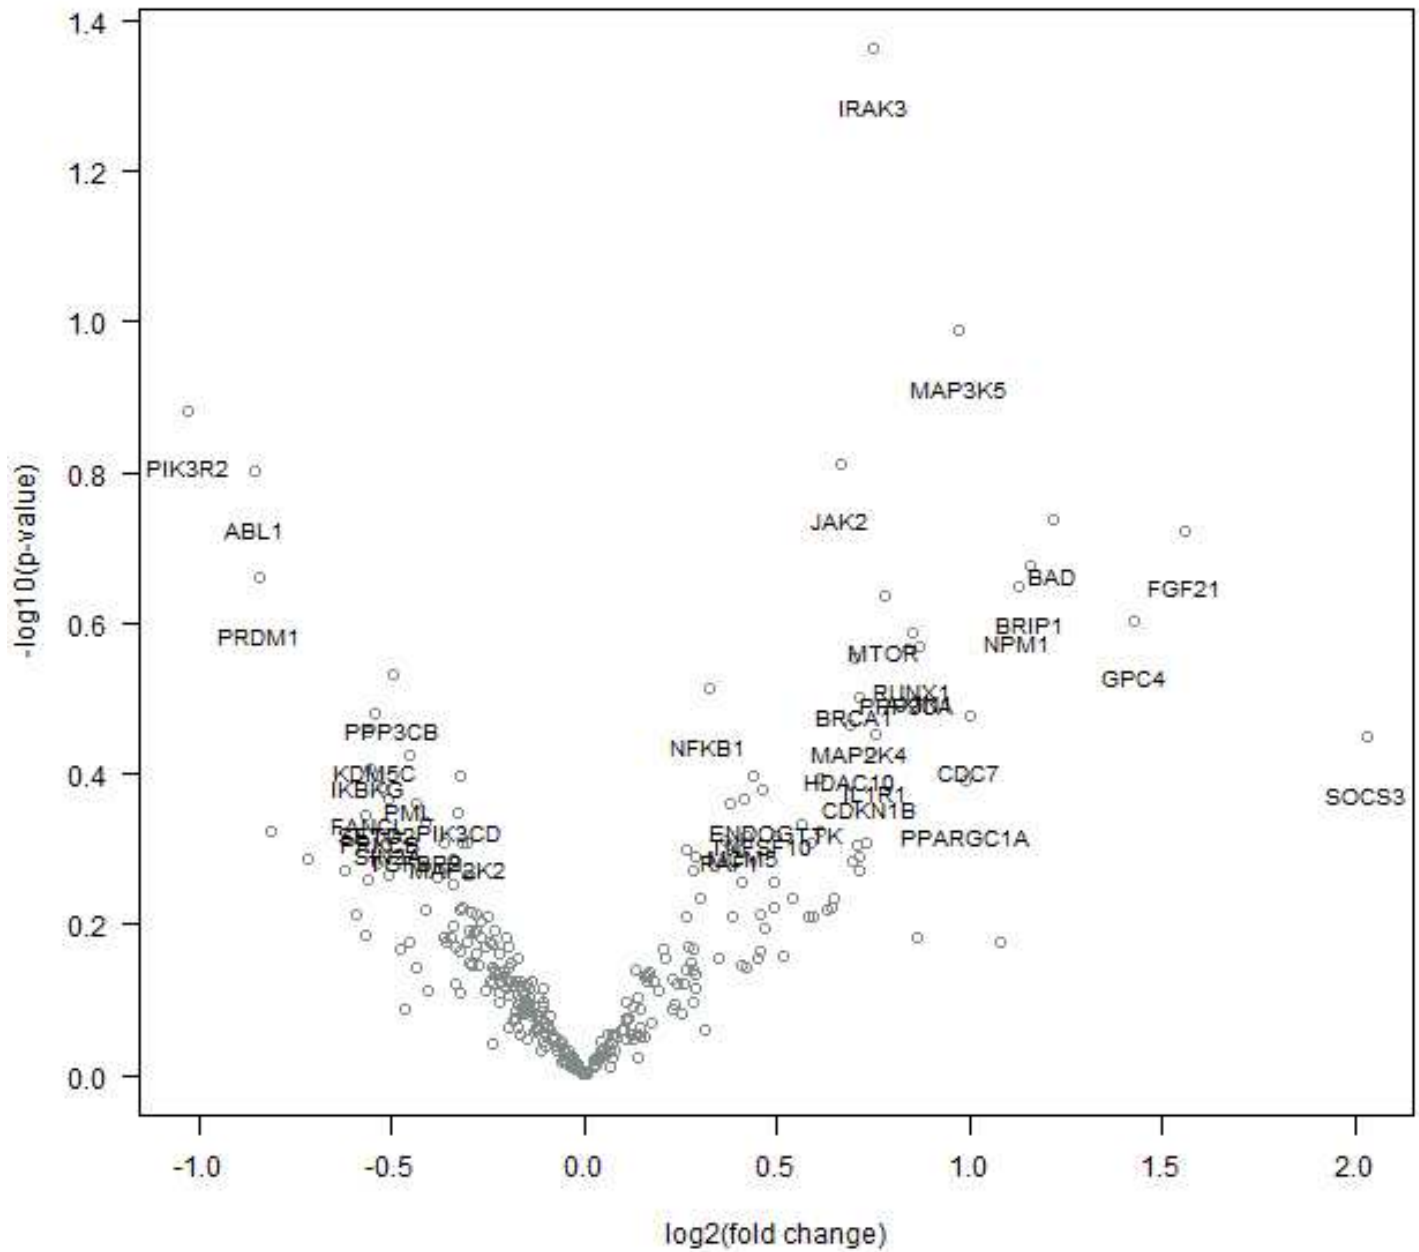

Cytokine Expression CMML  
Supplemental Figure 6I

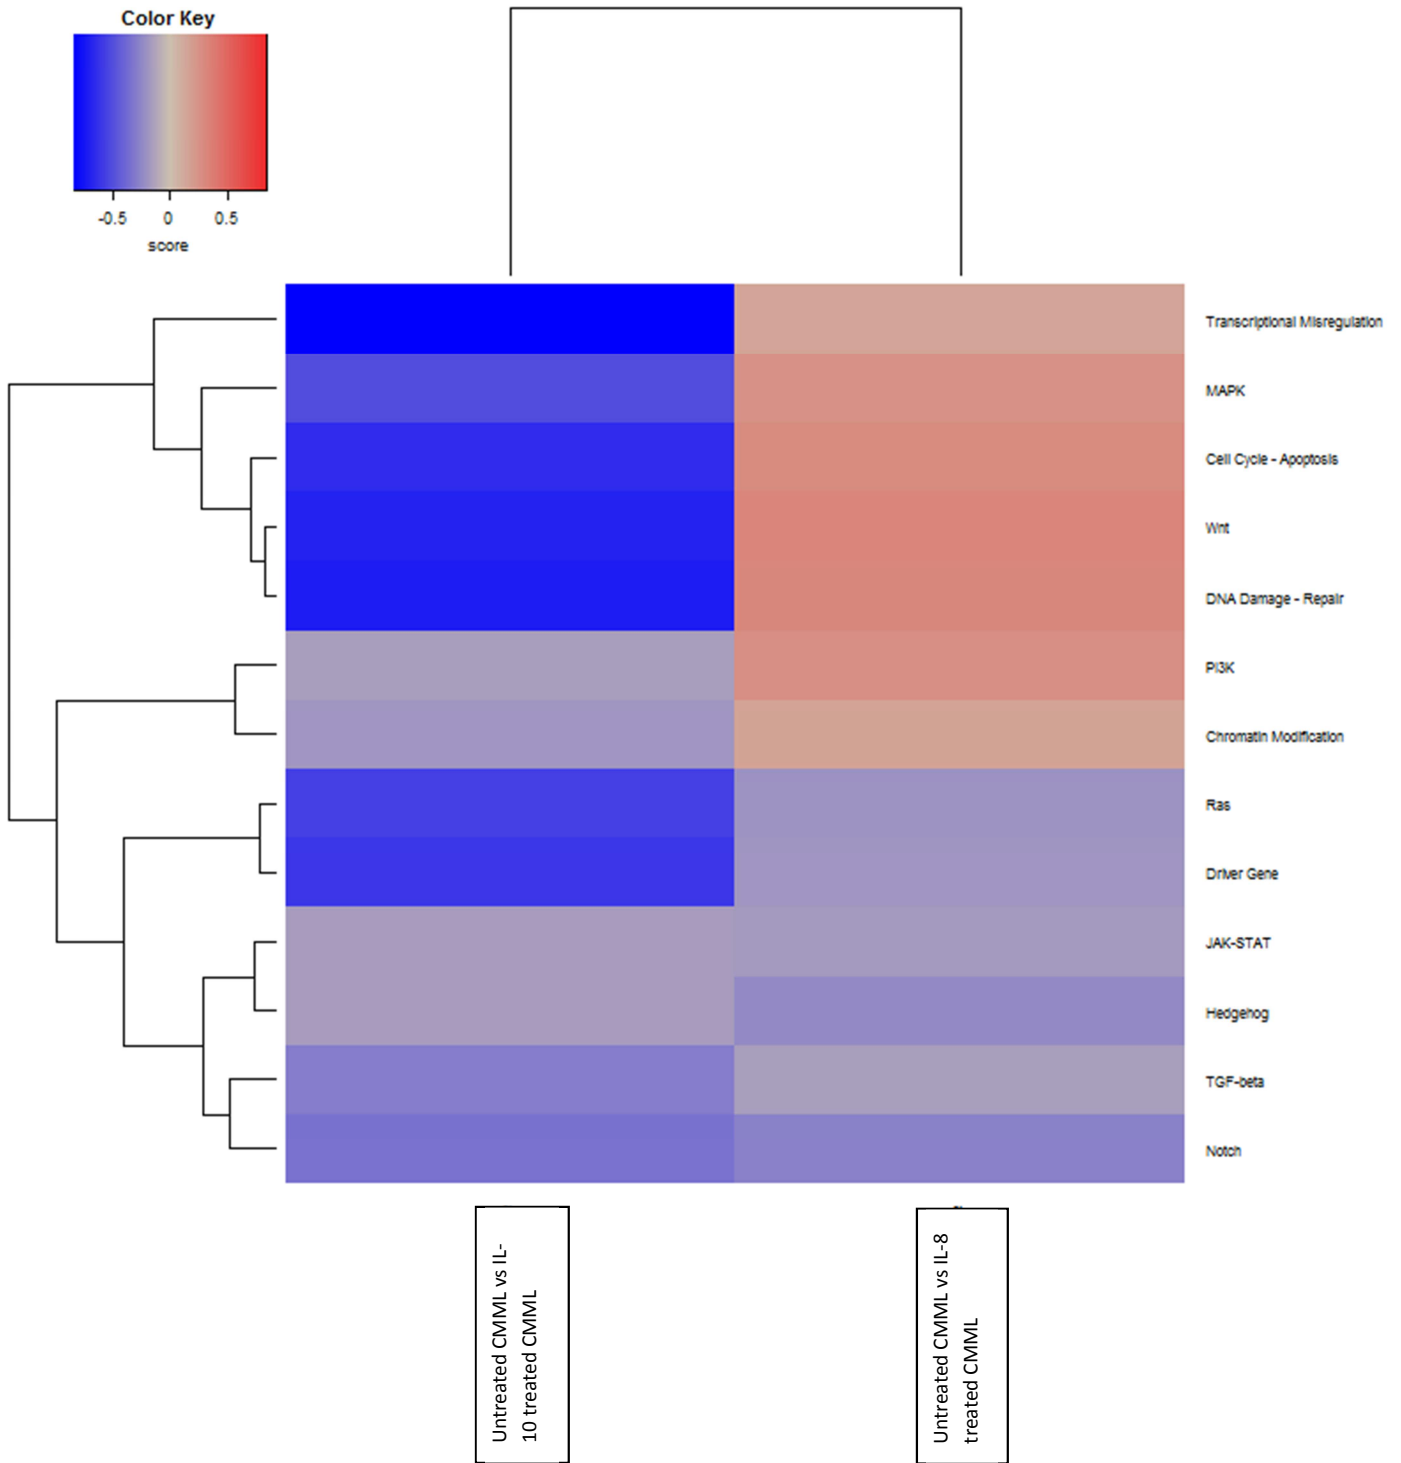

Cytokine Expression CMML  
**Supplemental Figure 7**

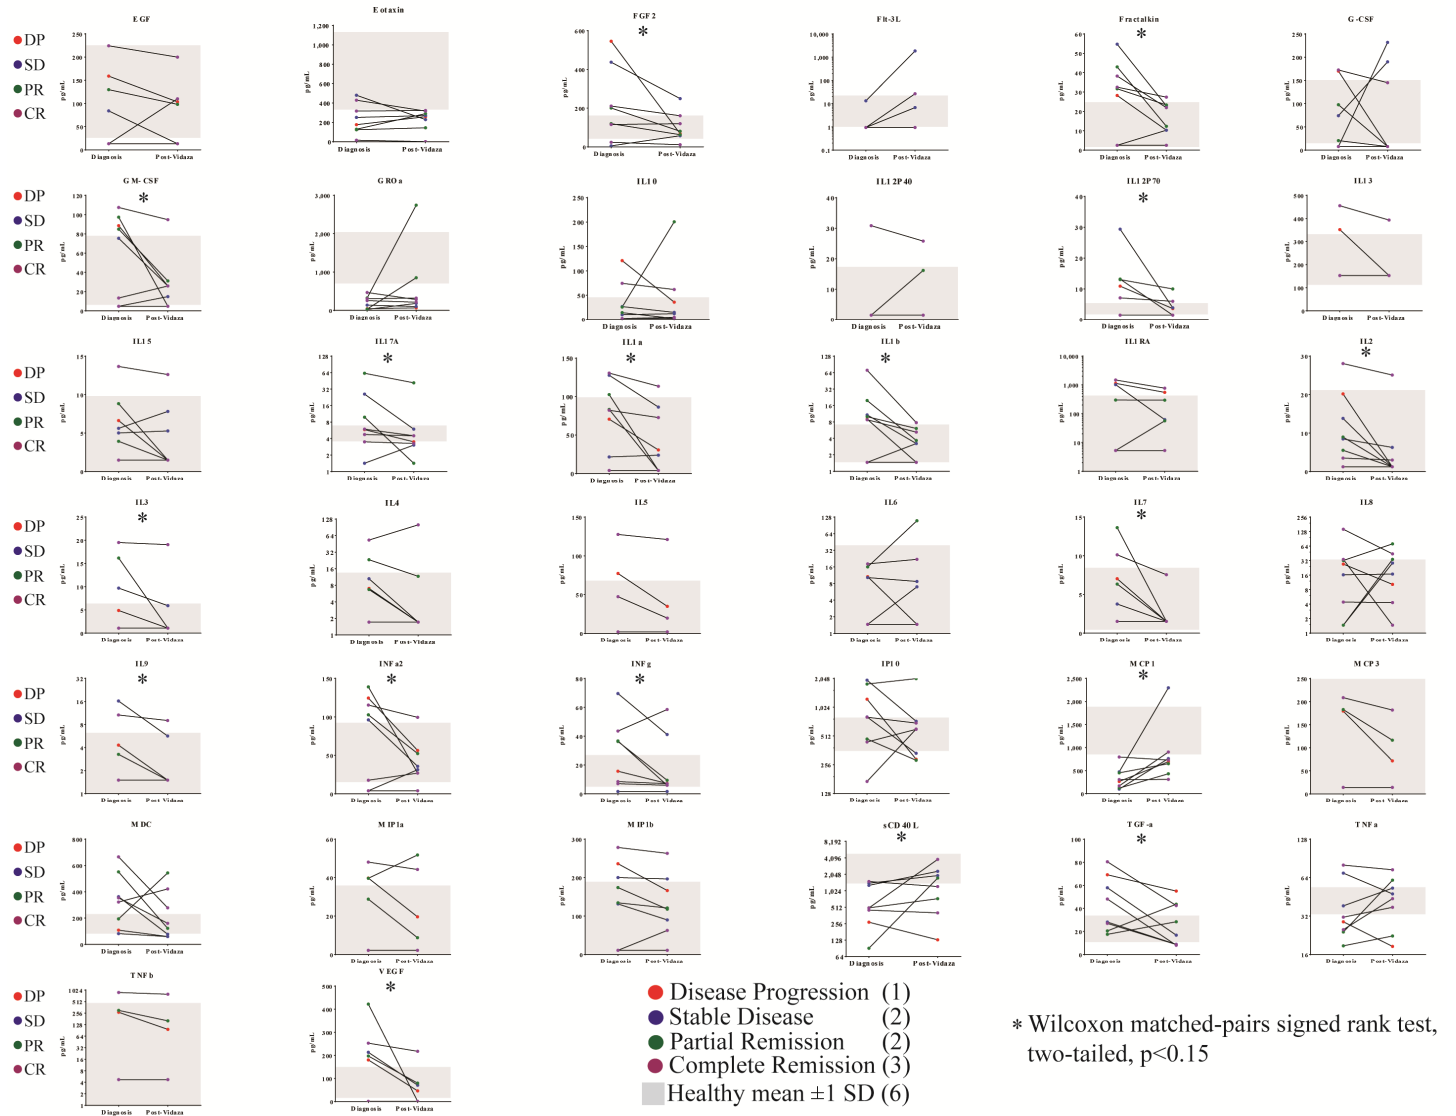

Supplement: NIHMS1655152-supplement-Supplementary_Figures.pdf [file NIHMS1655152-supplement-Supplementary_Figures.pdf]
